# Supplementary material
Source: PubMed Central journal article supplement (PMC7067529)
Supplement: jnm225789SupplementaryData.pdf [file jnm225789SupplementaryData.pdf]

Supplemental Table 1: Study Population Characteristics

|                                                              | Result                                                                                                               |
|--------------------------------------------------------------|----------------------------------------------------------------------------------------------------------------------|
| Age (years)                                                  | 64.1 ± 5.6 (64; 60 – 67.8)                                                                                           |
| PSA at time of imaging (ng/mL)                               | 11.3 ± 20.1 (7.3; 4.7 – 10.8)                                                                                        |
| Prior biopsy (number) per subject                            | 1.5 ± 1.3 (1; 1 - 2)                                                                                                 |
| Time interval from last biopsy to imaging (months) in n = 47 | 26.1 ± 27.8 (14; 8 - 33)                                                                                             |
| Prior known pathology per subject                            | 20 Gleason 3+3<br>3 Gleason 3+4<br>24 negative<br>9 without prior biopsy                                             |
| Time interval between MRI and PET (days)                     | 16.4 ± 21.0 (0; 0 - 31.8)                                                                                            |
| Time interval between PET/MRI to biopsy (days)               | 17.8 ± 14.9 (14; 8 - 22)                                                                                             |
| Further clinical management                                  | 20 prostatectomy<br>6 definitive radiation treatment<br>1 system treatment<br>25 surveillance<br>4 lost in follow-up |

Mean ± SD (median; 25% - 75% quartiles)

Supplemental Table 2A. Target characteristics stratified by mpMRI Likert results (reader 1).

| MRI Risk Classification<br>(Likert) | N  | Target Volume (cm <sup>3</sup> ) | SUV <sub>mean</sub> | SUV <sub>mean</sub> TBR |
|-------------------------------------|----|----------------------------------|---------------------|-------------------------|
| Low (Likert 3)                      | 40 | 0.31 ± 0.31                      | 3.42 ± 1.92         | 1.16 ± 0.42             |
| Intermediate (Likert 4)             | 30 | 0.41 ± 0.35                      | 3.59 ± 1.85         | 1.53 ± 0.82             |
| High (Likert 5)                     | 20 | 0.89 ± 0.85 (*p=0.002)           | 4.78 ± 2.14         | 2.03 ± 1.20             |

N = 90

Mean ± SD.

\* Significant compared to Likert 3-4

Note: "target volume" refers to the segmentation volume pre-biopsy and not the actual tumor volume at histopathology.

Supplemental Table 2B. Target characteristics stratified by mpMRI PI-RADS v2 results (reader 1).

| MRI Risk Classification<br>(PI-RADS v2) | N  | Target Volume (cm <sup>3</sup> ) | SUV <sub>mean</sub> | SUV <sub>mean</sub> TBR |
|-----------------------------------------|----|----------------------------------|---------------------|-------------------------|
| Very Low (PI-RADS 2)                    | 38 | 0.43 ± 0.39                      | 3.74 ± 1.99         | 1.18 ± 0.48             |
| Low (PI-RADS 3)                         | 14 | 0.25 ± 0.35                      | 2.90 ± 1.26         | 1.23 ± 0.38             |
| Intermediate (PI-RADS 4)                | 23 | 0.30 ± 0.23                      | 3.36 ± 1.81         | 1.66 ± 0.85             |
| High (PI-RADS 5)                        | 15 | 1.04 ± 0.88 (*p=0.001)           | 5.34 ± 2.18         | 2.19 ± 1.34             |

N = 90

Mean ± SD.

\* Significant compared to PI-RADS 2-4

Note: “target volume” refers to the segmentation volume pre-biopsy and not the actual tumor volume at histopathology.

Supplemental Table 2C. Target characteristics stratified by pre-imaging histopathology results.

| Pathology     | N  | Target Volume (cm <sup>3</sup> ) | SUV <sub>mean</sub> | SUV <sub>mean</sub> TBR |
|---------------|----|----------------------------------|---------------------|-------------------------|
| Benign        | 52 | 0.36 ± 0.36                      | 3.46 ± 1.83         | 1.15 ± 0.40             |
| Gleason 3+3   | 9  | 0.21 ± 0.19                      | 2.70 ± 1.23         | 0.99 ± 0.29             |
| Gleason ≥ 3+4 | 29 | 0.75 ± 0.74 (*p=0.001)           | 4.66 ± 2.15         | 2.20 ± 1.09             |

N = 90

Mean ± SD. \* Significant compared to benign and Gleason 3+3

Note: "target volume" refers to the segmentation volume pre-biopsy and not the actual tumor volume at histopathology.

Supplemental Table 3A: Lesion-level results for detection of Gleason  $\geq$  3+4 cancer based on mpMRI Likert scores

|                          | True Positive (TP) | True Negative (TN) | False Positive (FP) | False Negative (FN) | Sensitivity %               | Specificity %               | Positive Predictive Value (PPV) %         | Negative Predictive Value (NPV) % | Accuracy %                  | AUC                                   |
|--------------------------|--------------------|--------------------|---------------------|---------------------|-----------------------------|-----------------------------|-------------------------------------------|-----------------------------------|-----------------------------|---------------------------------------|
| mpMRI Base Case Reader 1 | 25                 | 36                 | 25                  | 4                   | 86.21<br>(CI 68.34 - 96.11) | 59.02<br>(CI 45.68 - 71.45) | 50.00<br>(CI 41.71 - 58.29)               | 90.00<br>(CI 77.96 - 95.81)       | 67.78<br>(CI 57.1 - 77.25)  | 0.73<br>(CI 0.64-0.82)                |
| Model L1 Reader 1        | 27                 | 53                 | 8                   | 2                   | 93.10<br>(CI 77.23-99.15)   | 86.89<br>(CI 75.78-94.16)   | 77.14<br>(CI 59.86-89.58)<br>(*p<0.001)   | 96.36<br>(CI 87.47-99.56)         | 88.89<br>(CI 80.51-94.54)   | 0.90<br>(CI 0.84-0.96)<br>*(p<0.001)  |
| Model L2 Reader 1        | 22                 | 59                 | 2                   | 7                   | 75.86<br>(CI 56.46 - 89.7)  | 96.72<br>(CI 88.65 - 99.6)  | 91.67<br>(CI 73.00 - 98.97)<br>(*p<0.001) | 89.39<br>(CI 79.36 - 95.63)       | 90.00<br>(CI 81.86 - 95.32) | 0.86<br>(CI 0.78-0.95)<br>(*p<0.001)  |
| Model L3 Reader 1        | 24                 | 56                 | 5                   | 5                   | 82.76<br>(CI 64.23 - 94.15) | 91.80 (CI 81.90-97.28)      | 82.76<br>(CI 64.23 - 94.15)<br>(*p<0.001) | 91.80 (CI 81.90-97.28)            | 88.89<br>(CI 80.51-94.54)   | 0.87<br>(CI 0.80-0.95)<br>(*p= 0.003) |
| Model L4 Reader 1        | 25                 | 56                 | 5                   | 4                   | 86.21<br>(CI 68.34 - 96.11) | 91.80<br>(CI 81.90-97.28)   | 83.33<br>(CI 65.28-94.36)<br>(*p<0.001)   | 93.33<br>(CI 83.80 - 98.15)       | 90.00<br>(CI 81.86 - 95.32) | 0.89<br>(CI 0.82-0.96)<br>(*p< 0.001) |
| mpMRI Base Case Reader 2 | 23                 | 43                 | 18                  | 6                   | 79.31<br>(CI 60.28 - 92.01) | 70.49<br>(CI 57.43 - 81.48) | 56.1<br>(CI 45.39 - 66.27)                | 87.76<br>(CI 77.53 - 93.7)        | 73.33<br>(CI 62.97 - 82.11) | 0.75<br>(CI 0.65-0.84)                |
| Model L1                 | 26                 | 54                 | 7                   | 3                   | 89.66<br>(CI 72.65-97.81)   | 88.52<br>(CI 77.78-95.26)   | 78.79<br>(CI 61.09-91.02)                 | 94.74 (CI 85.38-98.90)            | 88.89                       | 0.89<br>(CI 0.82-0.96)                |

|                   |    |    |   |   |                        |                          |                                   |                        |                        |                                 |
|-------------------|----|----|---|---|------------------------|--------------------------|-----------------------------------|------------------------|------------------------|---------------------------------|
| Reader 2          |    |    |   |   |                        |                          | (*p=0.002)                        |                        | (CI 80.51-94.54)       | (*p=0.008)                      |
| Model L2 Reader 2 | 22 | 57 | 4 | 7 | 75.86 (CI 56.46-89.70) | 93.44 (CI 84.05-98.18)   | 84.62 (CI 65.13-95.64) (*p<0.001) | 89.06 (CI 78.75-95.49) | 87.78 (CI 79.18-93.74) | 0.85 (CI 0.76-0.93) (*p=0.001)  |
| Model L3 Reader 2 | 24 | 56 | 5 | 5 | 82.76 (CI 64.23-94.15) | 91.80 (CI 81.90-97.28)   | 82.76 (CI 64.23-94.15) (*p<0.001) | 91.80 (CI 81.90-97.28) | 88.89 (CI 80.51-94.54) | 0.87 (CI 0.79-0.95) (*p= 0.015) |
| Model L4 Reader 2 | 20 | 59 | 2 | 9 | 68.97 (CI 49.17-84.72) | 86.21 (CI 68.34 – 96.11) | 90.91 (CI 70.84-98.88) (*p<0.001) | 86.76 (CI 76.36-93.77) | 87.78 (CI 79.18-93.74) | 0.83 (CI 0.74-0.92) (*p=0.025)  |

N = 90

\* Significant compared to mpMRI base case (Likert 4-5)

CI: 95% confidence interval; TP: true positive; TN: true negative; FP: false-positive; FN: false-negative; PPV: positive predictive value; NPV: negative predictive value; AUC: area under the receiver operator characteristic curve

Supplemental Table 3B: Lesion-level results for detection of Gleason  $\geq$  3+4 cancer based on mpMRI PI-RADS v2 scores

|                          | True Positive (TP) | True Negative (TN) | False Positive (FP) | False Negative (FN) | Sensitivity %                           | Specificity %               | Positive Predictive Value (PPV) %           | Negative Predictive Value (NPV) % | Accuracy %                  | AUC                                  |
|--------------------------|--------------------|--------------------|---------------------|---------------------|-----------------------------------------|-----------------------------|---------------------------------------------|-----------------------------------|-----------------------------|--------------------------------------|
| mpMRI Base Case Reader 1 | 27                 | 36                 | 25                  | 2                   | 93.10<br>(CI 77.23-99.15)               | 59.02<br>(CI 45.68-71.45)   | 51.92<br>(CI 37.63-65.99)                   | 94.74<br>(CI 82.25-99.36)         | 70.00<br>(CI 59.43 – 79.21) | 0.76<br>(CI 0.68-0.84)               |
| Model P1                 | 27                 | 55                 | 6                   | 2                   | 93.10<br>(CI 77.23-99.15)               | 90.16<br>(CI 79.81-96.30)   | 81.82<br>(CI 64.54-93.02)<br>(*p<0.001)     | 96.49<br>(CI 87.89-99.57)         | 91.11<br>(CI 83.23 – 96.08) | 0.92<br>(CI 0.86-0.98)<br>(*p<0.001) |
| Model P2                 | 20                 | 61                 | 0                   | 9                   | 68.97<br>(CI 49.17 – 84.72)             | 100.00<br>(CI 94.13-100.00) | 100.00<br>(CI 83.16 – 100.00)<br>(*p<0.001) | 87.14<br>(CI 79.76 – 92.10)       | 90.00<br>(CI 81.86 – 95.32) | 0.84<br>(CI 0.76-0.93)<br>(*p=0.050) |
| Model P3                 | 24                 | 56                 | 5                   | 5                   | 82.76<br>(CI 64.23-94.15)               | 91.80<br>(CI 81.90-97.28)   | 82.76<br>(CI 64.23-94.15)<br>(*p<0.001)     | 91.80<br>(CI 81.90-97.28)         | 88.89<br>(CI 80.51-94.54)   | 0.87<br>(CI 0.79-0.95)<br>(*p=0.021) |
| Model P4                 | 22                 | 59                 | 2                   | 7                   | 75.86<br>(CI 56.46-89.70)<br>(*p<0.001) | 96.72<br>(CI 88.65 – 99.60) | 91.67<br>(CI 73.00 – 98.97)<br>(*p<0.001)   | 89.39<br>(CI 79.36 – 95.63)       | 90.00<br>(CI 81.86 – 95.32) | 0.86<br>(CI 0.78-0.95)<br>(*p=0.034) |
|                          |                    |                    |                     |                     |                                         |                             |                                             |                                   |                             |                                      |
| mpMRI Base Case Reader 2 | 29                 | 20                 | 41                  | 0                   | 100.00<br>(CI 88.06-100.00)             | 32.79<br>(CI 21.31-46.00)   | 41.43<br>(CI 29.77-53.83)                   | 100.00<br>(CI 83.16-100.00)       | 54.44<br>(CI 43.6 – 64.98)  | 0.66<br>(CI 0.60-0.72)               |

|                     |    |    |   |   |                               |                                  |                                                 |                               |                                  |                                           |
|---------------------|----|----|---|---|-------------------------------|----------------------------------|-------------------------------------------------|-------------------------------|----------------------------------|-------------------------------------------|
| Model P1<br>Reader2 | 24 | 54 | 7 | 5 | 82.76<br>(CI 64.23-<br>94.15) | 88.52<br>(CI<br>77.78-<br>95.26) | 77.42<br>(CI 58.90-<br>90.41)<br><br>(*p<0.001) | 91.53<br>(CI 81.32-<br>97.19) | 86.67<br>(CI<br>77.87-<br>92.92) | 0.86<br>(CI 0.78-0.94)<br><br>(*p<0.0001) |
| Model P2<br>Reader2 | 21 | 57 | 4 | 8 | 72.41<br>(CI 52.76-<br>87.27) | 93.44<br>(CI<br>84.05-<br>98.18) | 84.00<br>(CI 63.92-<br>95.46)<br><br>(*p<0.001) | 87.69<br>(CI 77.18-<br>94.53) | 86.67<br>(CI<br>77.87-<br>92.92) | 0.83<br>(CI 0.74-0.92)<br><br>(*p< 0.001) |
| Model P3<br>Reader2 | 24 | 56 | 5 | 5 | 82.76<br>(CI 64.23-<br>94.15) | 91.80<br>(CI<br>81.90-<br>97.28) | 82.76<br>(CI 64.23-<br>94.15)<br><br>(*p<0.001) | 91.80<br>(CI 81.90-<br>97.28) | 88.89<br>(CI 80.51-<br>94.54)    | 0.87<br>(CI 0.79-0.95)<br><br>(*p<0.001)  |
| Model P4<br>Reader2 | 21 | 59 | 2 | 8 | 72.41<br>(CI 52.76-<br>87.27) | 96.72<br>(CI<br>88.65-<br>99.60) | 91.30<br>(CI 71.96-<br>98.93)<br><br>(*p<0.001) | 88.06<br>(CI 77.82-<br>94.70) | 88.89<br>(CI 80.51-<br>94.54)    | 0.85<br>(CI 0.76-0.93)<br><br>(*p<0.001)  |

N = 90

\* Significant compared to mpMRI base case (PI-RADS 3-5)

CI: 95% confidence interval; TP: true positive; TN: true negative; FP: false-positive; FN: false-negative; PPV: positive predictive value; NPV: negative predictive value; AUC: area under the receiver operator characteristic curve

Supplemental Table 4A: Subject-Level Results for Detection of Gleason  $\geq$  3+4 Cancer Based on mpMRI Likert Scores

|                          | True Positive (TP) | True Negative (TN) | False Positive (FP) | False Negative (FN) | Sensitivity %               | Specificity %                 | Positive Predictive Value (PPV) %         | Negative Predictive Value (NPV) % | Accuracy %                  | AUC                                   |
|--------------------------|--------------------|--------------------|---------------------|---------------------|-----------------------------|-------------------------------|-------------------------------------------|-----------------------------------|-----------------------------|---------------------------------------|
| mpMRI Base Case Reader 1 | 23                 | 16                 | 13                  | 4                   | 85.19<br>(CI 66.27 – 95.81) | 55.17<br>(CI 35.69 – 73.55)   | 63.89<br>(CI 53.42 – 73.18)               | 80.00<br>(CI 60.45 – 91.28)       | 69.64<br>(CI 55.90 – 81.22) | 0.70<br>(CI 0.59-0.82)                |
| Model L1                 | 25                 | 27                 | 2                   | 2                   | 92.59<br>(CI 75.71 – 99.09) | 93.10<br>(CI 77.23 – 99.15)   | 92.59<br>(CI 76.57 – 97.95)<br>(*p=0.002) | 93.10<br>(CI 78.00 – 98.09)       | 92.86<br>(CI 82.71 – 98.02) | 0.93<br>(CI 0.86-1.00)<br>(*p< 0.001) |
| Model L2                 | 20                 | 29                 | 0                   | 7                   | 74.07<br>(CI 57.44 – 90.60) | 100.00                        | 100.00<br>(*p<0.001)                      | 80.56<br>(CI 63.98 – 91.81)       | 87.50<br>(CI 75.93 – 94.82) | 0.87<br>(CI 0.79-0.95)<br>(*p=0.004)  |
| Model L3                 | 21                 | 27                 | 2                   | 6                   | 77.78<br>(CI 57.74 – 91.38) | 93.10<br>(CI 77.23 – 99.15)   | 91.30<br>(CI 71.96 – 98.93)<br>(*p=0.003) | 81.82<br>(CI 64.54 – 93.02)       | 85.71<br>(CI 73.78 – 93.62) | 0.85<br>(CI 0.76-0.95)<br>(*p=0.019)  |
| Model L4                 | 24                 | 29                 | 0                   | 3                   | 88.89<br>(CI 70.84 – 97.65) | 100.00<br>(CI 88.06 – 100.00) | 100.00<br>(*p<0.001)                      | 90.62<br>(CI 76.88 – 96.56)       | 94.64<br>(CI 85.13 – 98.88) | 0.94<br>(CI 0.88-1.00)<br>(*p<0.001)  |
|                          |                    |                    |                     |                     |                             |                               |                                           |                                   |                             |                                       |
| mpMRI Base Case Reader 2 | 22                 | 19                 | 10                  | 5                   | 81.48<br>(CI 61.92-93.70)   | 65.52 (CI 45.67-82.06)        | 68.75<br>(CI 49.99-83.88)                 | 79.17 (CI 57.85-92.87)            | 73.21<br>(CI 59.70-84.17)   | 0.74<br>(CI 0.62-0.85)                |
| Model L1 Reader2         | 23                 | 26                 | 3                   | 4                   | 85.19 (CI 66.27-95.81)      | 89.66 (CI 72.65-97.81)        | 88.46<br>(CI 69.85-97.55)<br>(*p=0.010)   | 86.67 (CI 69.28-96.24)            | 87.50<br>(CI 75.93-94.82)   | 0.87<br>(CI 0.79-0.96)<br>(*p=0.014)  |
| Model L2 Reader2         | 20                 | 27                 | 2                   | 7                   | 74.07<br>(CI 53.72-88.89)   | 93.10<br>(CI 77.23-99.15)     | 90.91<br>(CI 70.84-98.88)<br>(*p=0.003)   | 79.41<br>(CI 62.10-91.30)         | 83.93<br>(CI 71.67-92.38)   | 0.84<br>(CI 0.74-0.93)<br>(*p=0.020)  |

|                     |    |    |   |   |                                  |                                  |                                              |                                |                                  |                                      |
|---------------------|----|----|---|---|----------------------------------|----------------------------------|----------------------------------------------|--------------------------------|----------------------------------|--------------------------------------|
| Model L3<br>Reader2 | 21 | 27 | 2 | 6 | 77.78 (CI<br>57.74-<br>91.38)    | 93.10<br>(CI 77.23<br>– 99.15)   | 91.30<br>(CI 71.96 –<br>98.93)<br>(*p=0.007) | 81.82<br>(CI 64.54<br>- 93.02) | 85.71<br>(CI 73.78<br>– 93.62)   | 0.85<br>(CI 0.76-0.95)<br>(*p=0.043) |
| Model L4<br>Reader2 | 18 | 28 | 1 | 9 | 66.67<br>(CI<br>46.04-<br>83.48) | 96.55<br>(CI<br>82.24-<br>99.91) | 94.74<br>(CI 73.97-<br>99.87)<br>(*p=0.002)  | 75.68<br>(CI 58.80-<br>88.23)  | 82.14<br>(CI<br>69.60-<br>91.09) | 0.82<br>(CI 0.72-0.91)<br>(*p=0.073) |

N = 56

\* Significant compared to mpMRI base case (Likert 4-5)

CI: 95% confidence interval; TP: true positive; TN: true negative; FP: false-positive; FN: false-negative; PPV: positive predictive value; NPV: negative predictive value; AUC: area under the receiver operator characteristic curve

Supplemental Table 4B: Subject-Level Results for Detection of Gleason  $\geq$  3+4 Cancer Based on mpMRI PI-RADS v2 Scores

|                         | True Positive (TP) | True Negative (TN) | False Positive (FP) | False Negative (FN) | Sensitivity %               | Specificity %                 | Positive Predictive Value (PPV) %         | Negative Predictive Value (NPV) % | Accuracy %                  | AUC                                  |
|-------------------------|--------------------|--------------------|---------------------|---------------------|-----------------------------|-------------------------------|-------------------------------------------|-----------------------------------|-----------------------------|--------------------------------------|
| mpMRI Base Case Reader1 | 25                 | 17                 | 12                  | 2                   | 92.59<br>(CI 75.71 – 99.09) | 58.62<br>(CI 38.94 – 76.48)   | 67.57<br>(CI 57.15 – 76.50)               | 89.47<br>(CI 68.39 – 97.09)       | 75.00<br>(CI 61.63 – 85.61) | 0.76<br>(CI 0.65-0.86)               |
| Model P1                | 24                 | 27                 | 2                   | 3                   | 88.89<br>(CI 70.84 – 97.65) | 93.10<br>(CI 77.23 – 99.15)   | 92.31<br>(CI 75.79 – 97.87)<br>(*p=0.004) | 90.00<br>(CI 75.51 – 96.33)       | 91.07<br>(CI 80.38 – 97.04) | 0.91<br>(CI 0.83-0.99)<br>(*p=0.009) |
| Model P2                | 17                 | 29                 | 0                   | 10                  | 62.96<br>(CI 42.37 – 80.60) | 100.00<br>(CI 88.06 – 100.00) | 100.00<br>(*p<0.001)                      | 74.36<br>(CI 63.94 – 82.59)       | 82.14<br>(CI 69.60 – 91.09) | 0.81<br>(CI 0.72-0.92)<br>(p=0.182)  |
| Model P3                | 21                 | 27                 | 2                   | 6                   | 77.78<br>(CI 57.74-91.38)   | 93.10<br>(CI 77.23-99.15)     | 91.30<br>(CI 71.96-98.93)<br>(*p=0.007)   | 81.82<br>(CI 64.54-93.02)         | 85.71<br>(CI 73.78-93.62)   | 0.85<br>(CI 0.76-0.95)<br>(p=0.086)  |
| Model P4                | 19                 | 29                 | 0                   | 8                   | 70.37<br>(CI 49.82 – 86.25) | 100.00<br>(CI 88.06 – 100.00) | 100.00<br>(*p<0.001)                      | 78.38<br>(CI 66.96 – 86.64)       | 85.71<br>(CI 73.78 – 93.62) | 0.85<br>(CI 0.76-0.94)<br>(p=0.078)  |
|                         |                    |                    |                     |                     |                             |                               |                                           |                                   |                             |                                      |
| mpMRI Base Case Reader2 | 25                 | 8                  | 21                  | 2                   | 92.59<br>(CI 75.71-99.09)   | 27.59<br>(CI 12.73 – 47.24)   | 54.35<br>(CI 39.01-69.10)                 | 80.00<br>(CI 44.39-97.48)         | 58.93<br>(CI 44.98-71.90)   | 0.60<br>(CI 0.50-0.70)               |
| Model P1 Reader2        | 21                 | 25                 | 4                   | 6                   | 77.78<br>(CI 57.74-91.38)   | 86.21<br>(CI 68.34-96.11)     | 84.00<br>(CI 63.92-95.46)<br>(*p<0.001)   | 80.65<br>(CI 62.53-92.55)         | 82.14<br>(CI 69.60-91.09)   | 0.82<br>(CI 0.72-0.92)<br>(*p<0.001) |
| Model P2 Reader2        | 19                 | 26                 | 3                   | 8                   | 70.37                       | 89.66                         | 86.36<br>(CI 65.09-97.09)                 | 76.47                             | 80.36                       | 0.80<br>(CI 0.70-0.90)               |

|                  |    |    |   |   |                             |                           |                                         |                             |                           |                                      |
|------------------|----|----|---|---|-----------------------------|---------------------------|-----------------------------------------|-----------------------------|---------------------------|--------------------------------------|
|                  |    |    |   |   | (CI 49.82-86.25)            | (CI 72.65-97.81)          | (*p<0.001)                              | (CI 58.83-89.25)            | (CI 67.57-89.77)          | (*p<0.001)                           |
| Model P3 Reader2 | 21 | 27 | 2 | 6 | 77.78<br>(CI 57.74-91.38)   | 93.10<br>(CI 77.23-99.15) | 91.30<br>(CI 71.96-98.93)<br>(*p<0.001) | 81.82<br>(CI 64.54 - 93.02) | 85.71<br>(CI 73.78-93.62) | 0.85<br>(CI 0.76-0.95)<br>(*p<0.001) |
| Model P4 Reader2 | 19 | 28 | 1 | 8 | 70.37<br>(CI 49.82 - 86.25) | 96.55<br>(CI 82.24-99.91) | 95.00<br>(CI 75.13-99.87)<br>(*p<0.001) | 77.78<br>(CI 60.85-89.88)   | 83.93<br>(CI 71.67-92.38) | 0.83<br>(CI 0.74-0.93)<br>(*p<0.001) |

N = 56

\* Significant compared to mpMRI base case (PI-RADS v2 3-5)

CI: 95% confidence interval; TP: true positive; TN: true negative; FP: false-positive; FN: false-negative; PPV: positive predictive value; NPV: negative predictive value; AUC: area under the receiver operator characteristic curve

Supplemental Table 5A: Distributions of lesion-based Likert scores

|          | Likert 3 |      | Likert 4 |      | Likert 5 |      |
|----------|----------|------|----------|------|----------|------|
|          | Pos.     | Neg. | Pos.     | Neg. | Pos.     | Neg. |
| Reader 1 | 4        | 37   | 8        | 21   | 17       | 3    |
| Reader 2 | 6        | 43   | 9        | 16   | 14       | 2    |

N = 90

Pos.: positive; Neg.: negative for Gleason  $\geq$  3+4

Supplemental Table 5B: Distributions of lesion-based PI-RADS v2 scores

|          | PI-RADS 2 |      | PI-RADS 3 |      | PI-RADS 4 |      | PI-RADS 5 |      |
|----------|-----------|------|-----------|------|-----------|------|-----------|------|
|          | Pos.      | Neg. | Pos.      | Neg. | Pos.      | Neg. | Pos.      | Neg. |
| Reader 1 | 2         | 36   | 4         | 10   | 9         | 14   | 14        | 1    |
| Reader 2 | 0         | 20   | 5         | 23   | 17        | 16   | 7         | 2    |

N = 90

Pos.: positive; Neg.: negative for Gleason  $\geq$  3+4

Supplemental Table 5C: Distributions of subject-based Likert scores

|          | Likert 3 |      | Likert 4 |      | Likert 5 |      |
|----------|----------|------|----------|------|----------|------|
|          | Pos.     | Neg. | Pos.     | Neg. | Pos.     | Neg. |
| Reader 1 | 4        | 36   | 8        | 22   | 17       | 3    |
| Reader 2 | 6        | 43   | 9        | 16   | 14       | 2    |

N = 56

Pos.: positive; Neg.: negative for Gleason  $\geq$  3+4

Supplemental Table 5D: Distributions of subject-based PI-RADS v2 scores

|          | PI-RADS 2 |      | PI-RADS 3 |      | PI-RADS 4 |      | PI-RADS 5 |      |
|----------|-----------|------|-----------|------|-----------|------|-----------|------|
|          | Pos.      | Neg. | Pos.      | Neg. | Pos.      | Neg. | Pos.      | Neg. |
| Reader 1 | 2         | 36   | 4         | 10   | 9         | 14   | 14        | 1    |
| Reader 2 | 0         | 20   | 5         | 23   | 17        | 16   | 7         | 2    |

N = 56

Pos.: positive; Neg.: negative for Gleason  $\geq$  3+4
